# Supplementary material for: Case Report: Clinical Description of a Patient Carrying a 12.48 Mb Microdeletion Involving the 10p13–15.3 Region
Source: Frontiers journal article supplement (doi:10.3389/fped.2021.603666), 2021-02-25
Supplement: Table_1.XLS [file Table_1.XLS]

## Sheet: Sheet1
Supplementary Table 1. The causes of hypocalcemia.
Type	Cause	Syndrome
Hypocalcemia and a low PTH level	Congenital causes	Familial isolated hypoparathyroidism
		DiGeorge syndrome
		Certain mitochondrial disorders
	Acquired causes	Infection
		Auto-immune disorders
		Destruction of the parathyroid gland after surgery or radiation therapy, and infiltrative causes
Hypocalcemia and a high PTH level	PTH resistance	End-organ resistance to PTH
		Missense mutations in PTH
		Hypomagnesemia
		Hyperphosphatemia	Tissue hypoxia caused by asphyxia,RDS and intracranial hemorrhage,and increased phosphorus release
	Calcium loss	Acute	Sepsis
			Pancretitis
			Tumor lysis syndrome
			Respiratory alkalosis
		Chronic	Renal disease
			Hyperphosphatemia
			Osteoblastic metastases
	Poor calcium intake or absorption	Deficiency of or resistance to Vitamin D	Genetic causes	Deficiencies in enzymes
				Defects in the vitamin D receptor
			Prenatal causes	Maternal vitamin D deficiency,prematurity
			Perinatal causes
			Childhood causes	Obesity, malabsorption, and low sun exposure, decreased nutritional
References
1. Virkud YV, Fernandes ND, Lim R, et al. Case 39-2020: A 29-Month-Old Boy with Seizure and Hypocalcemia. N Engl J Med 2020; 383: 2462-2470. 2020/12/17. DOI: 10.1056/NEJMcpc2027078
